# Supplementary material
Source: Research Square preprint supplement (doi:10.21203/rs.3.rs-9678352/v1)
Supplement: Supplementary file 1 [file 2f6ec6c7601778aaff1d378d.doc]

**Electronic Supplementary Information**

**Chain-Length Dependent Cooling Efficiency of Fatty Acid-Modified Polyurethane: A Predictive Model for Thermal Regulation**

Ming-yi Li, Yu-Peng Zhao, Si-tong Zhang, Lan Jia*, Feng-bo Zhu, Wen-wen Yu

(School of Materials Science and Engineering, Taiyuan University of Technology, Taiyuan 030024, China;

* Corresponding author: [jialan@tyut.edu.cn](mailto:jialan@tyut.edu.cn)

Tab.S1 Expansion ratio of OPCMs/PU composites with varying phase change material contents

|  | 2.5 wt% | 5 wt% | 10 wt% |
| --- | --- | --- | --- |
| C10/PU | 1.01 | 1.01 | 1.02 |
| C11/PU | 1.01 | 1.02 | 1.03 |
| C12/PU | 1.02 | 1.02 | 1.03 |
| C14/PU | 1.03 | 1.03 | 1.03 |
| C16/PU | 1.04 | 1.02 | 1.02 |
| C18/PU | 1.03 | 1.01 | 1.01 |
| C20/PU | 1.02 | 1.04 | 1.03 |
| C22/PU | 1.01 | 1.02 | 1.05 |

Tab.S2 Viscosity (mPa·s) of Component A slurry of OPCMs/PU composites at various contents

|  | 2.5 wt% | 5 wt% | 10 wt% |
| --- | --- | --- | --- |
| C10/PU | 355.1 | 441.3 | 628.1 |
| C11/PU | 375 | 424.5 | 529.5 |
| C12/PU | 384.1 | 506.4 | 699.7 |
| C14/PU | 369.8 | 451.8 | 632.5 |
| C16/PU | 405.5 | 470.4 | 664.8 |
| C18/PU | 395 | 477 | 678.8 |
| C20/PU | 381.7 | 491.5 | 667.2 |
| C22/PU | 380.3 | 485.4 | 693.4 |

Tab.S3 Compressive strength (MPa) of composites with varying phase change material contents

| Sample | Compressive strength (MPa) | | |
| --- | --- | --- | --- |
| 2.5 wt% | 5 wt% | 10 wt% |
| C14/PU | 52 | 41 | 32 |
| C16/PU | 48 | 44 | 24 |
| C18/PU | 49 | 45 | 34 |
| C20/PU | 50 | 32 | 22 |
| C22/PU | 53 | 49 | 39 |


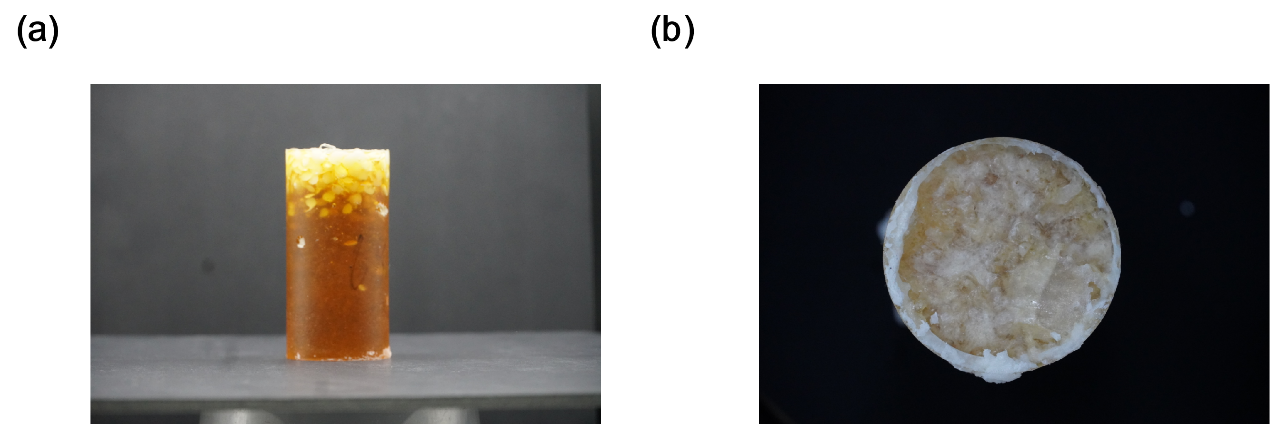


Fig.S1 (a) side surface and (b) top surface of the OPCMs/PU specimens for compression testing

Tab.S4 Maximum reaction temperature (℃) and cooling efficiency (%) of composites with varying phase change material contents

| Sample | Maximum reaction temperature (℃) | | | Cooling efficiency (%) | | |
| --- | --- | --- | --- | --- | --- | --- |
| 2.5 wt% | 5 wt% | 10 wt% | 2.5 wt% | 5 wt% | 10 wt% |
| C14/PU | 132.6 | 126.6 | 119.2 | 2.8 | 7.2 | 12.6 |
| C16/PU | 133.9 | 125.8 | 120.2 | 1.8 | 7.8 | 11.9 |
| C18/PU | 134.1 | 123.3 | 118.7 | 1.7 | 9.6 | 13 |
| C20/PU | 131.8 | 122.1 | 118.3 | 3.4 | 10.5 | 13.3 |
| C22/PU | 131.2 | 120.6 | 118.7 | 3.8 | 11.6 | 13 |
